# Supplementary material for: Starch Granules in Arabidopsis thaliana Mesophyll and Guard Cells Show Similar Morphology but Differences in Size and Number
Source: MDPI journal article supplement (doi:10.3390/ijms22115666), 2021-05-26
Supplement: s1 [file s1]

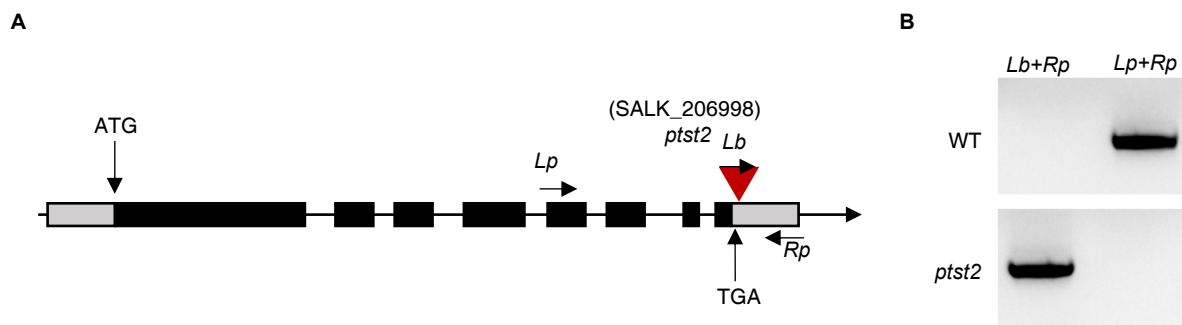

**Supplemental figure 1. Confirmation of PTST2 T-DNA insertion mutant (A)** Insertion site as referred to sequence information of TAIR database. **(B)** Confirmation of *ptst2*. Primers as indicated in **(A)**.
